# Supplementary material
Source: publisher figshare collection journal article supplement (https://tandf.figshare.com/ndownloader/files/16709738)
Supplement: Supplementary file 1 [file 16709738]

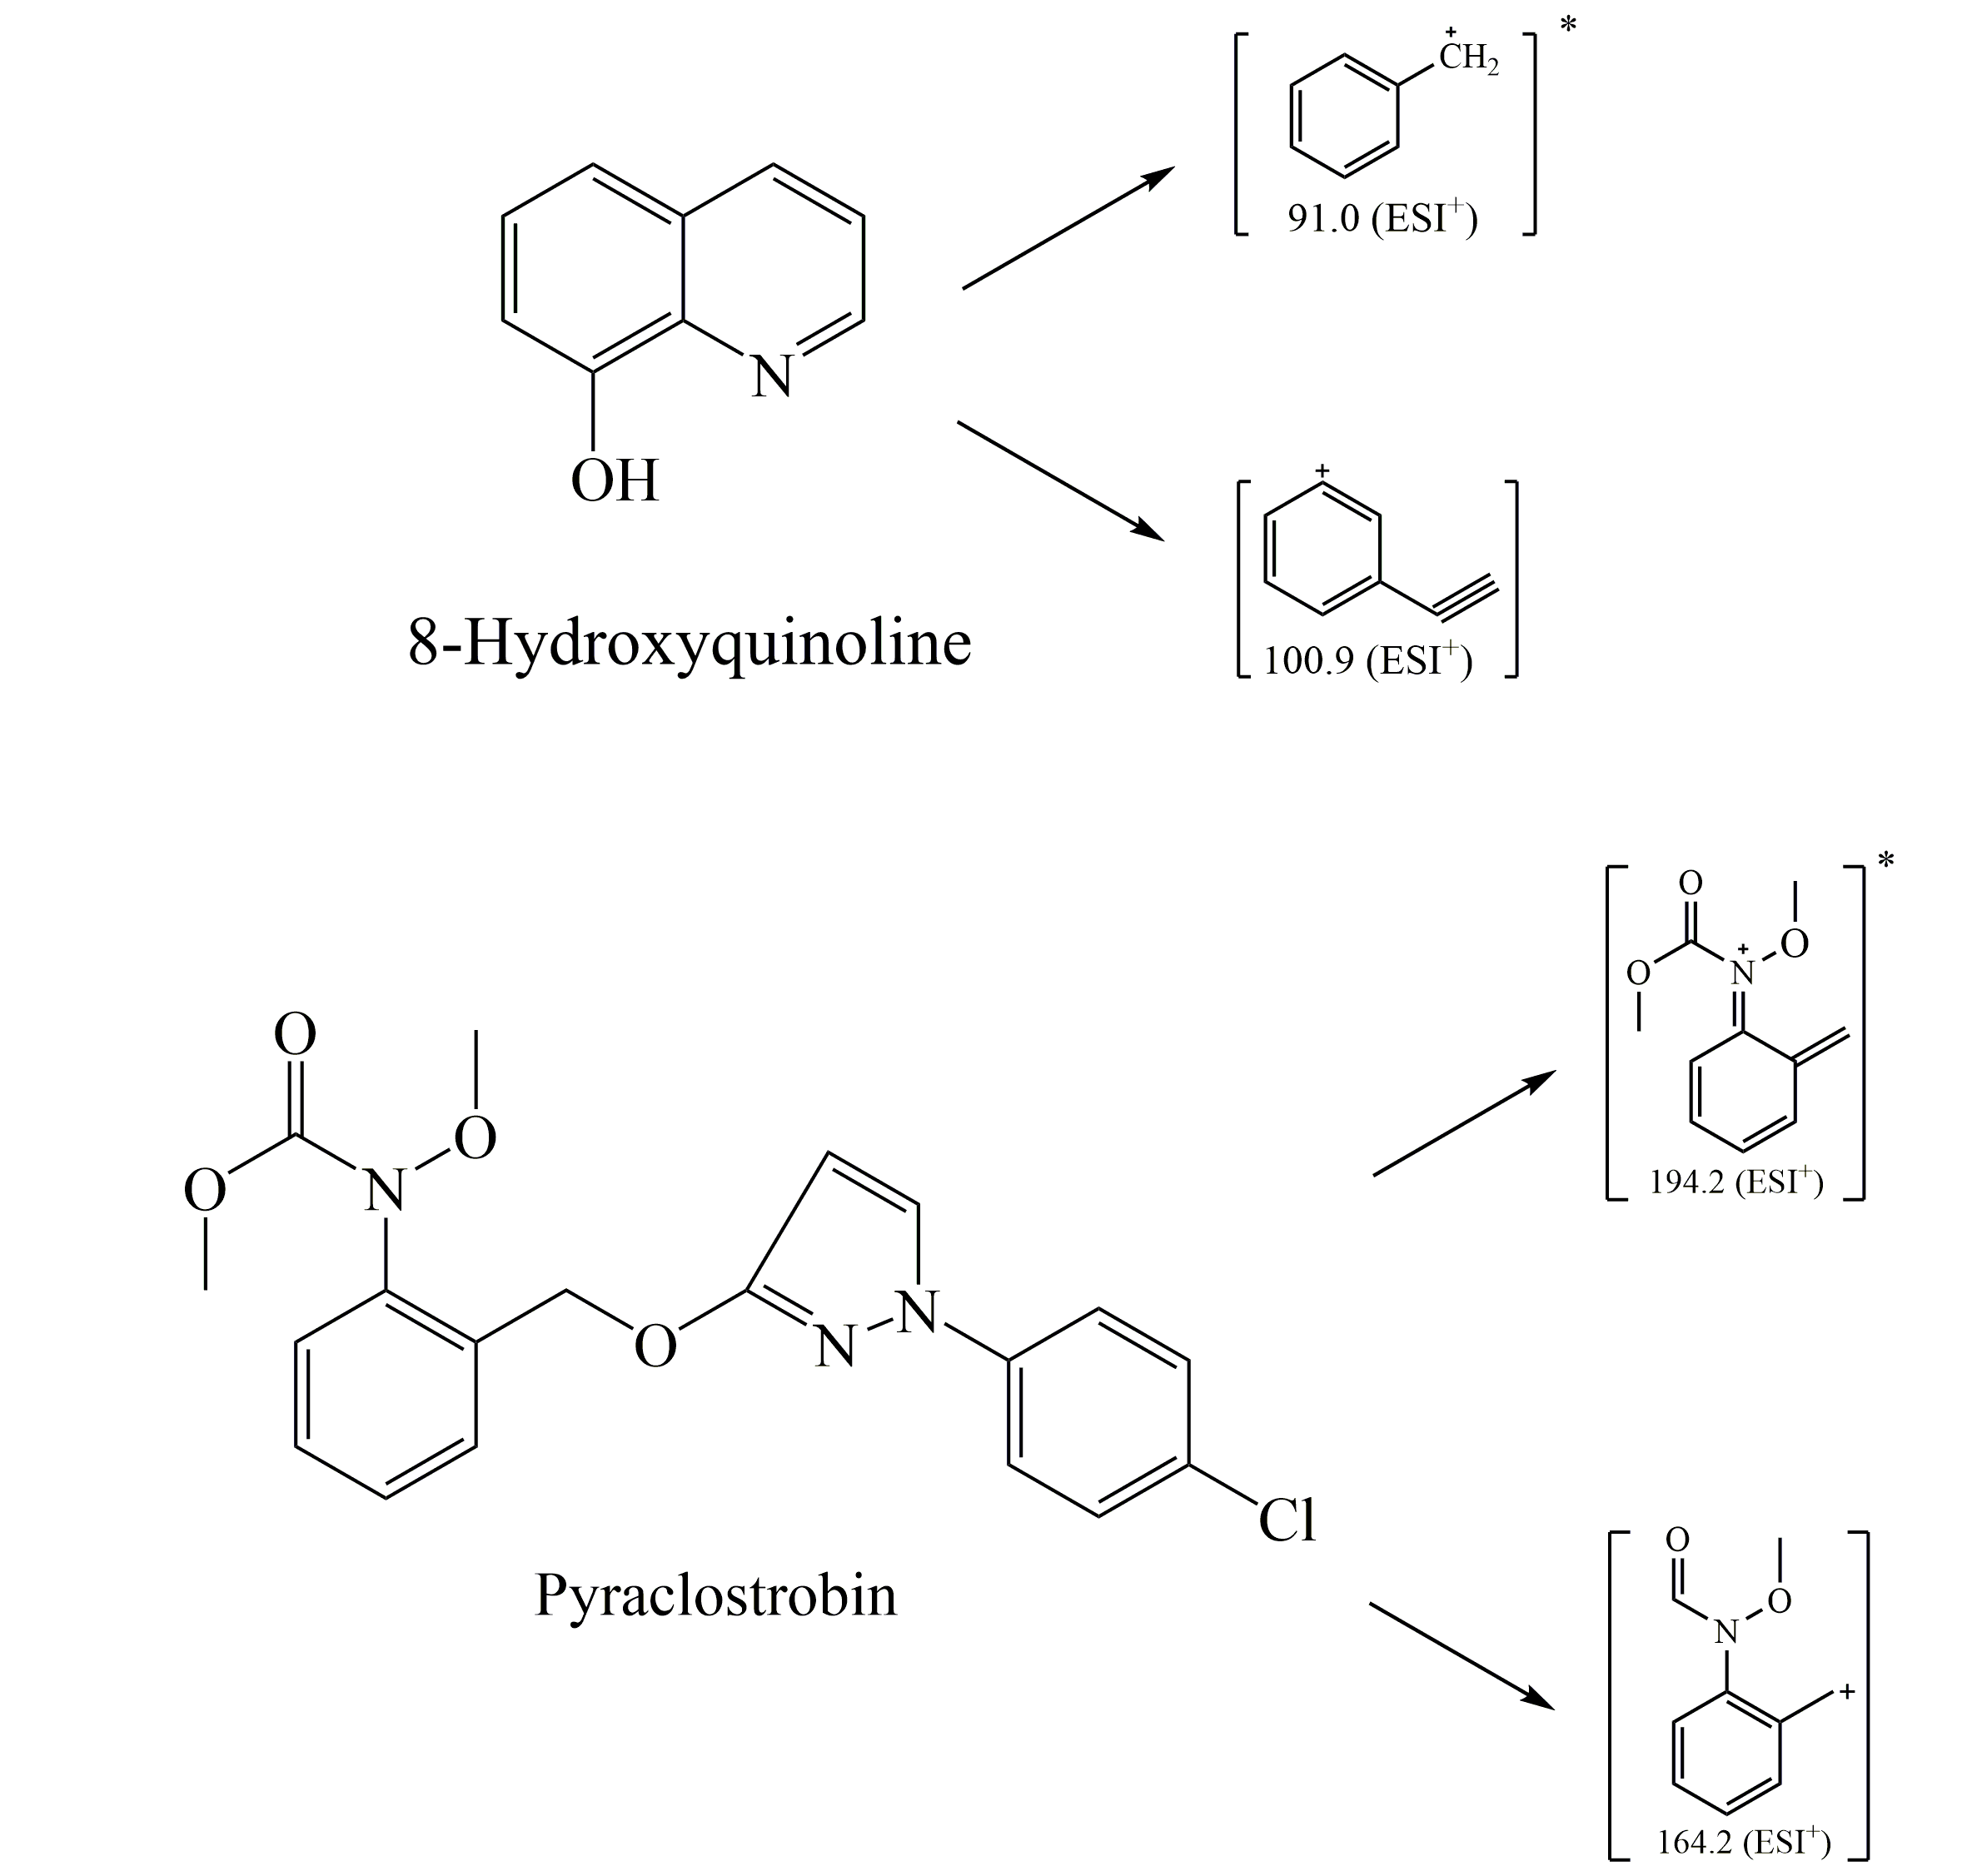


Figure S1. the structures of the fragmentation for 8-hydroxyquinoline and pyraclostrobin; *the fragmentation was quantitative ion pair.


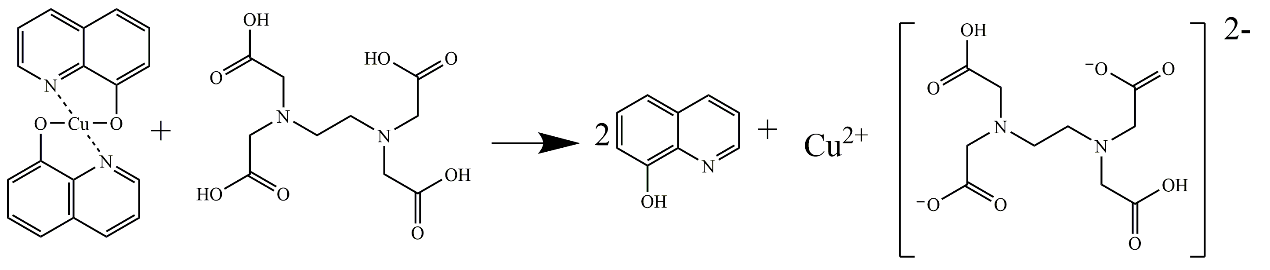


Figure S2. The derivatizaton reaction of conversion from oxine-copper to 8-hydroxyquinoline
